# Supplementary material
Source: Springer Nature journal article supplement (https://www.springermedizin.de/resource/supplementary/12958_2013_1136_MOESM1_ESM.pdf/9566880)
Supplement: MOESM1 [file 9566880]

A

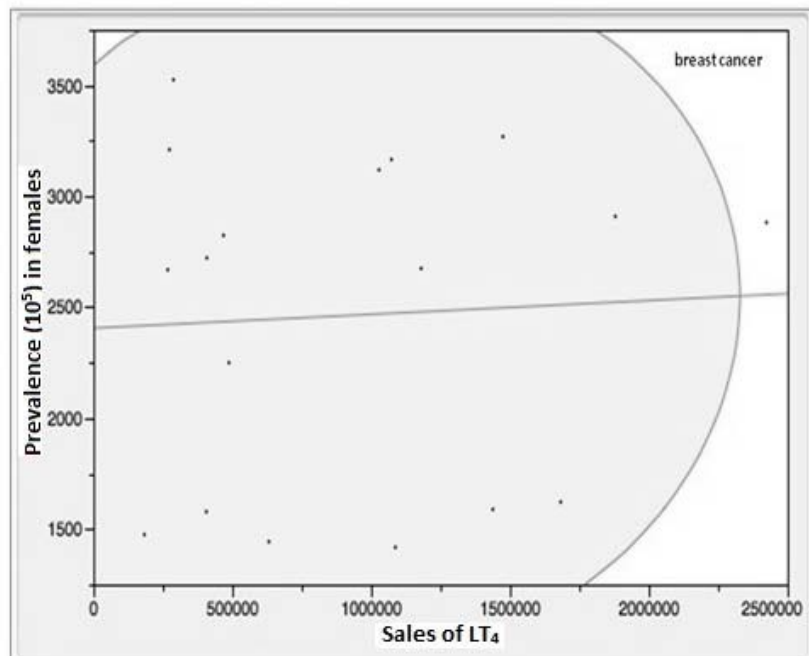

Correlation coefficient= 0.055  
 Prob Level= 0.828

B

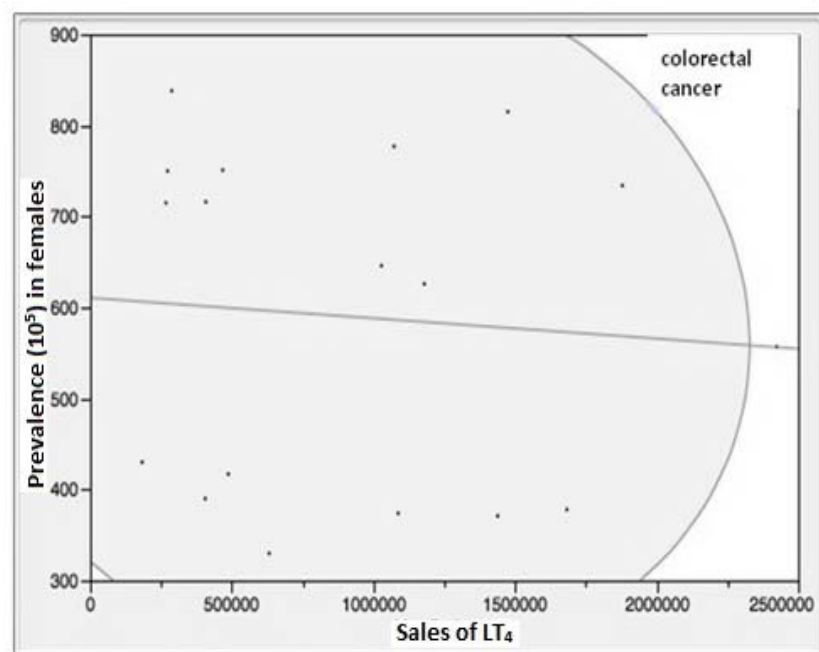

Correlation coefficient= -0.081  
 Prob Level= 0.750

C

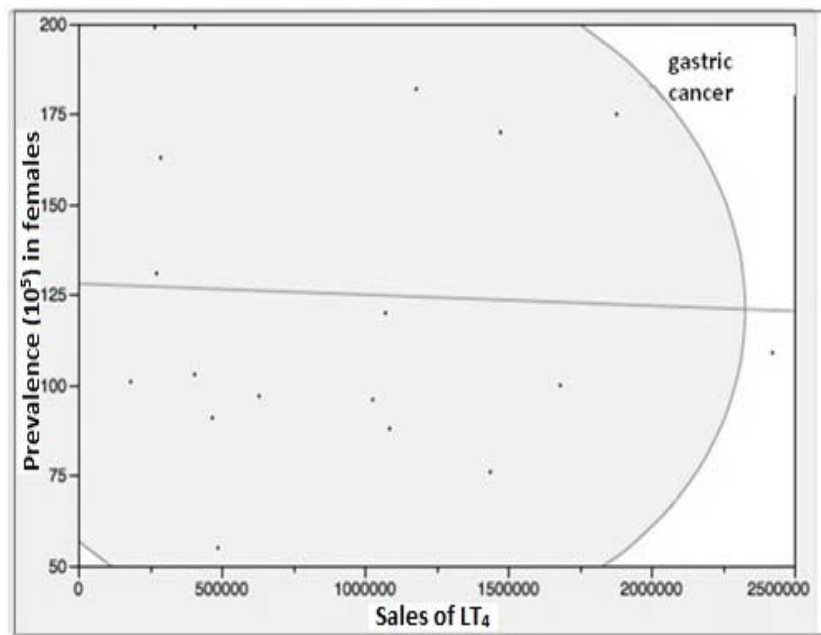

Correlation coefficient= -0.0451  
 Prob Level= 0.859

D

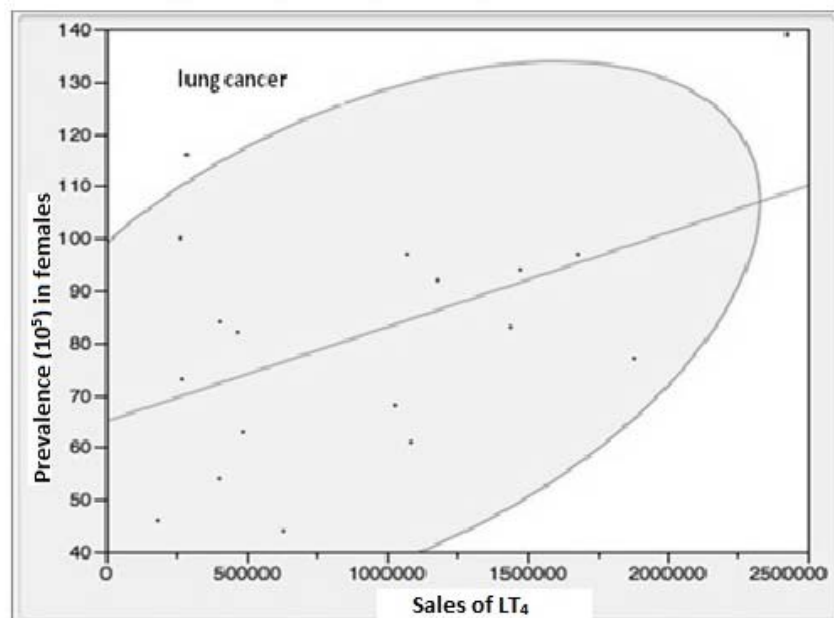

Correlation coefficient= 0.485  
 Prob Level= 0.0412
